# Supplementary material for: Immobilization of selenite from aqueous solution by structural ferrous hydroxide complexes
Source: Royal Society of Chemistry journal article supplement (doi:10.1039/c6ra26225b), 2017-01-01
Supplement: c6ra26225b1.pdf [file c6ra26225b1.pdf]

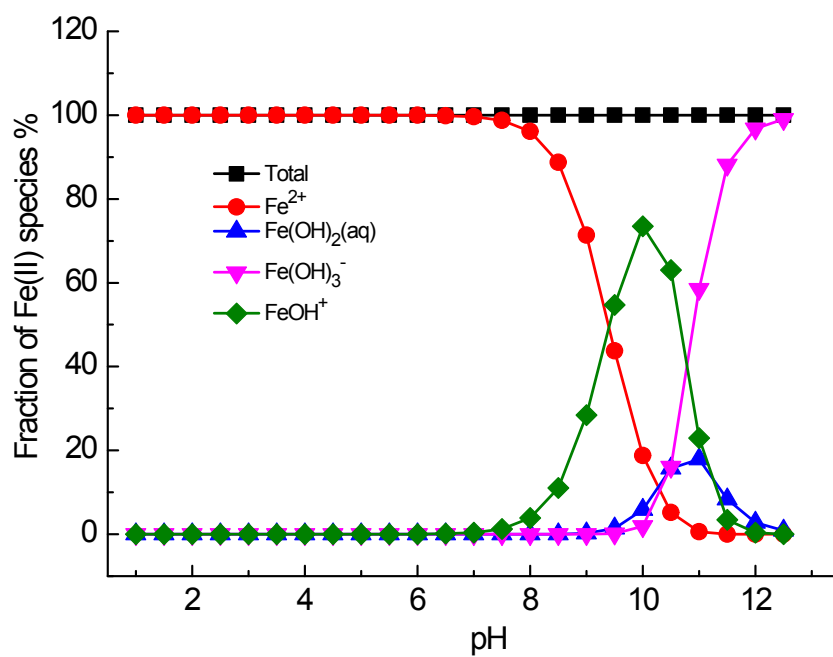

Fig.S1 Speciation of Fe(II) in water as a function of pH. (Calculated by employing Visual MINTEQ 3.0 software)
